# Supplementary material
Source: PubMed Central journal article supplement (PMC7575134)

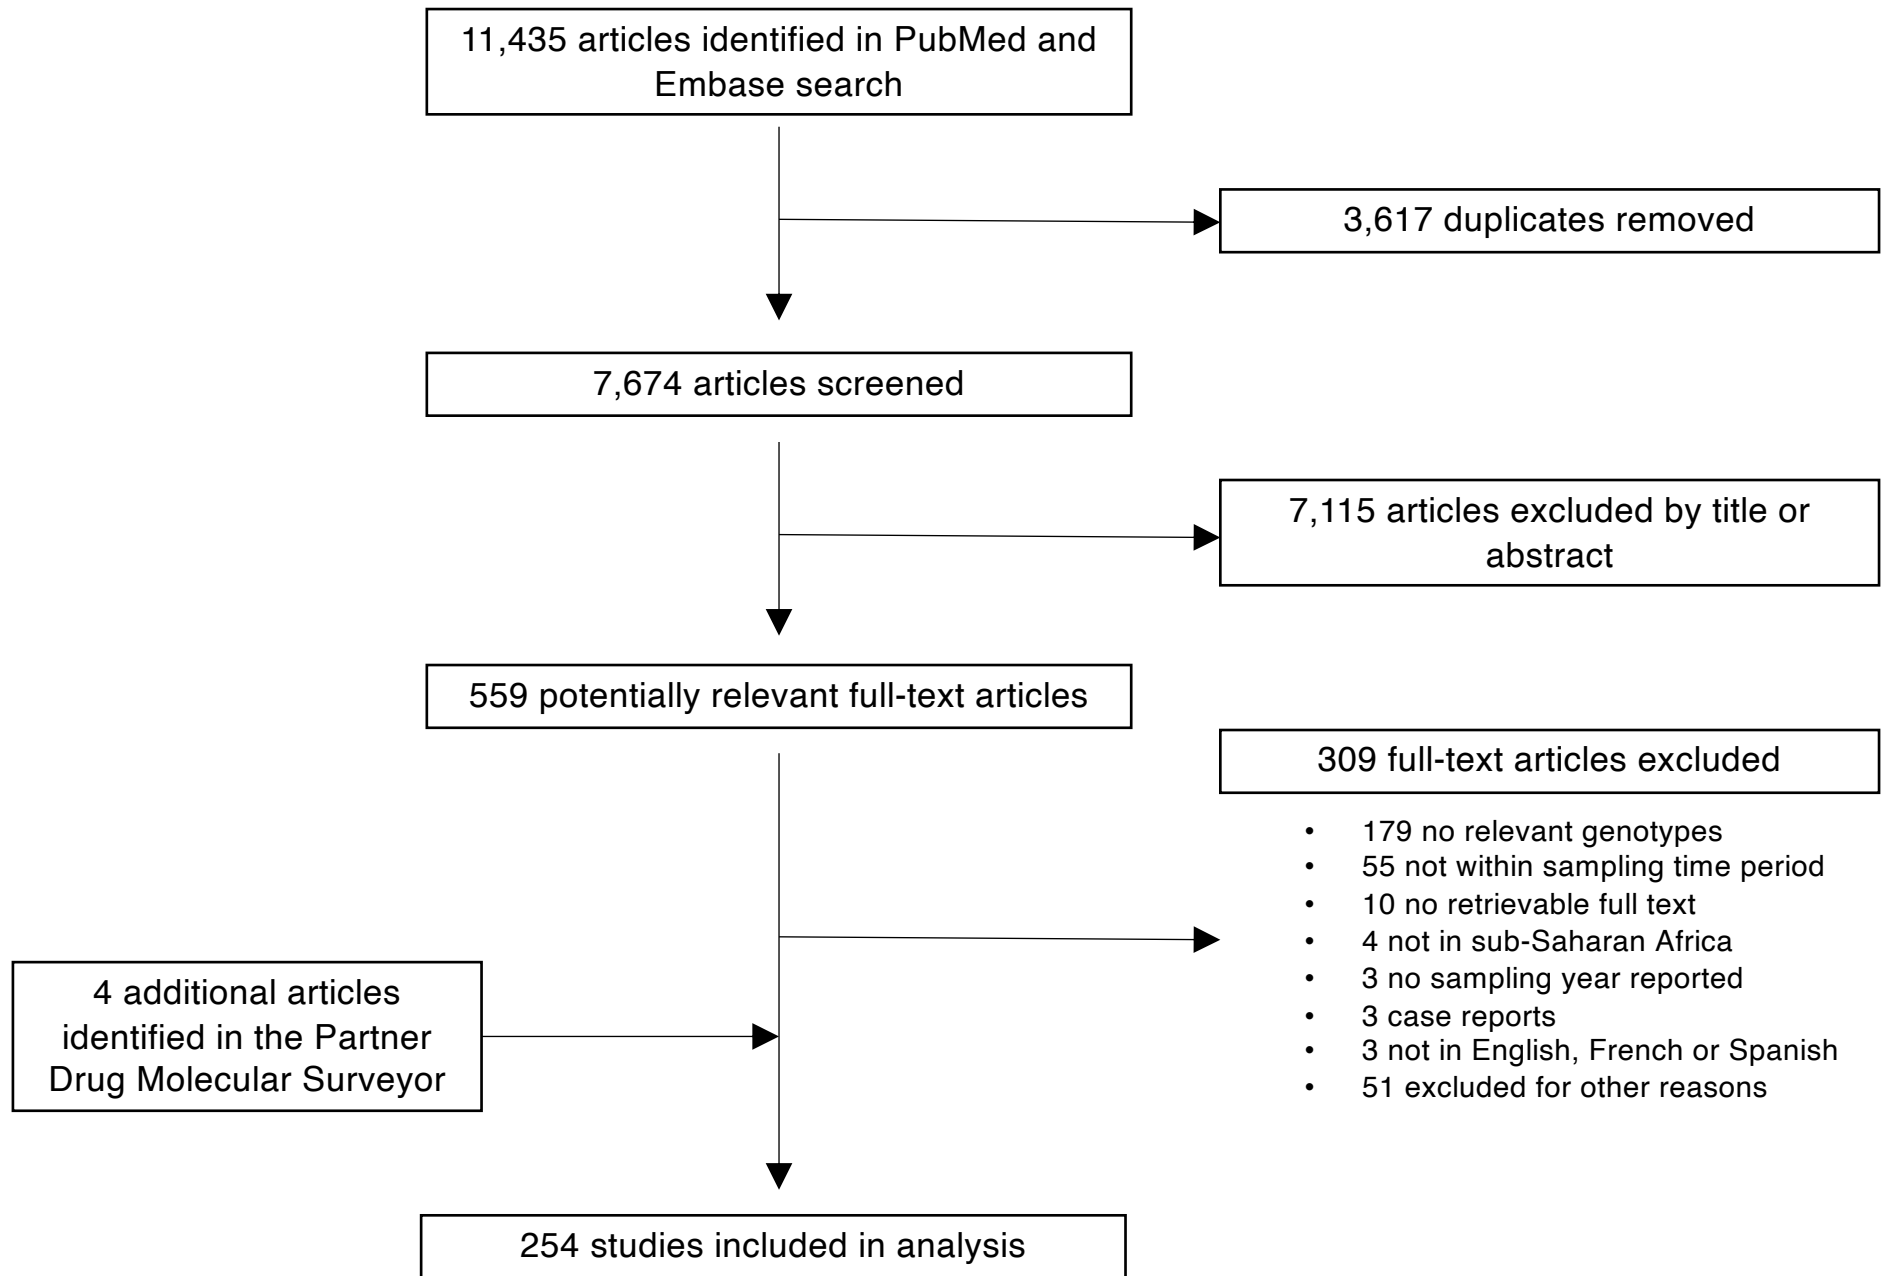

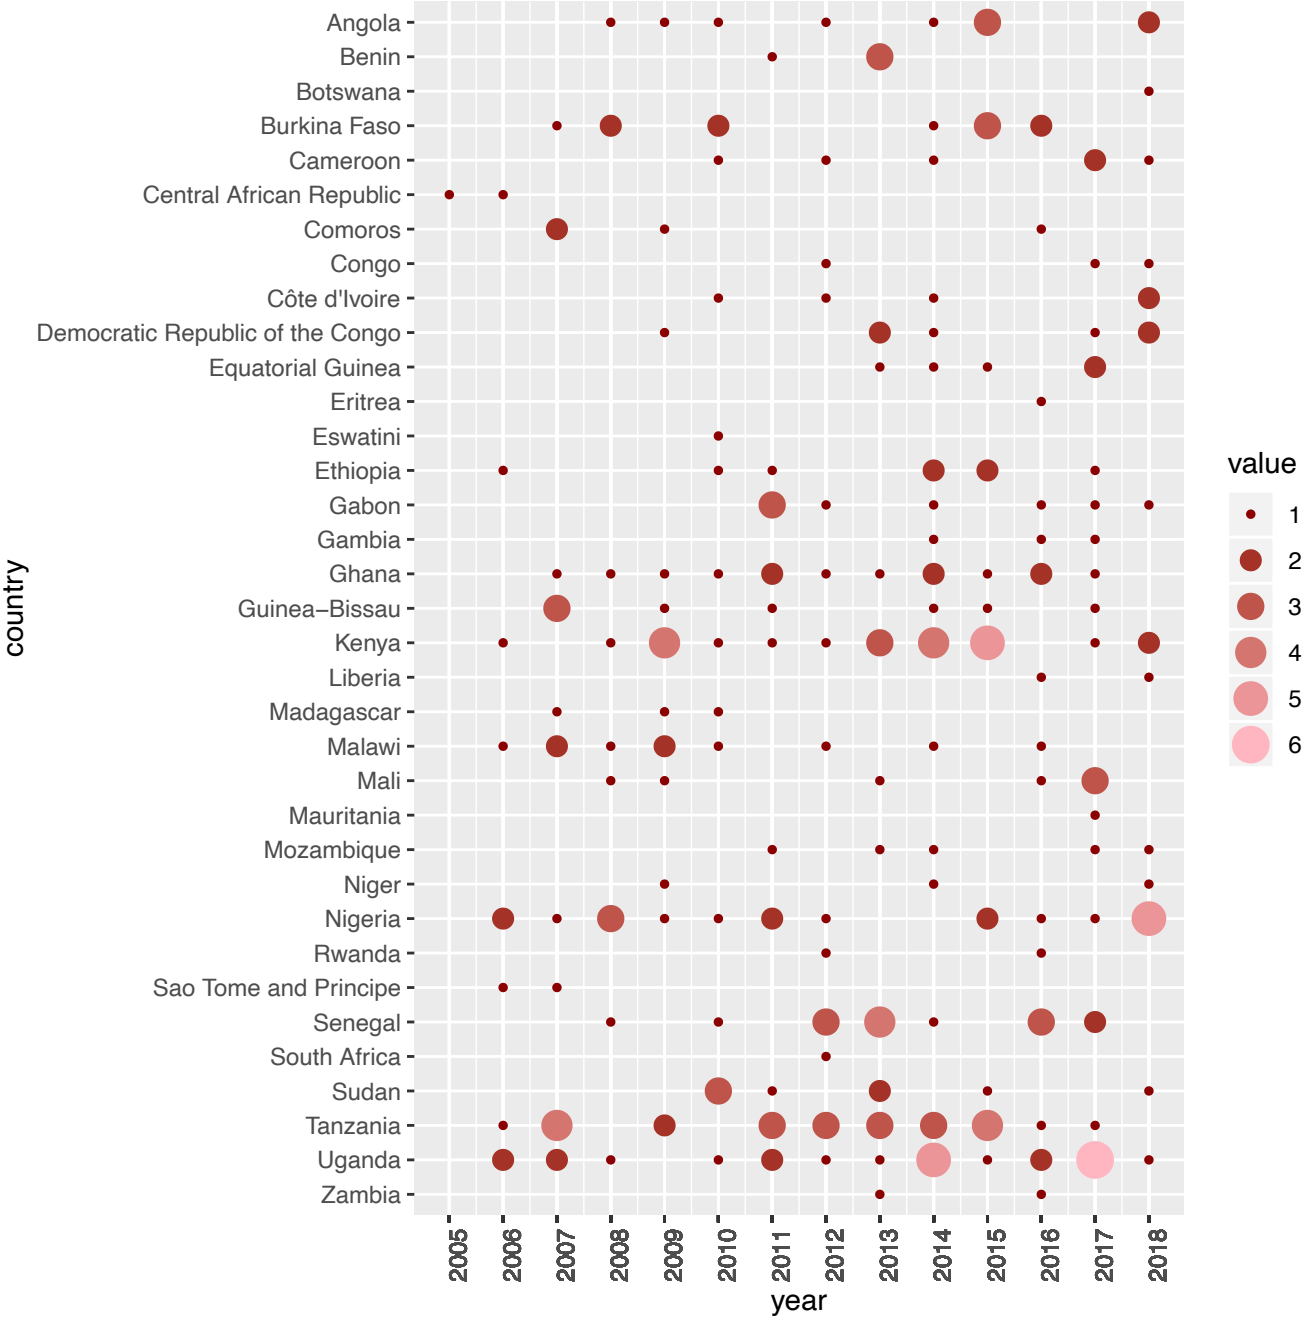

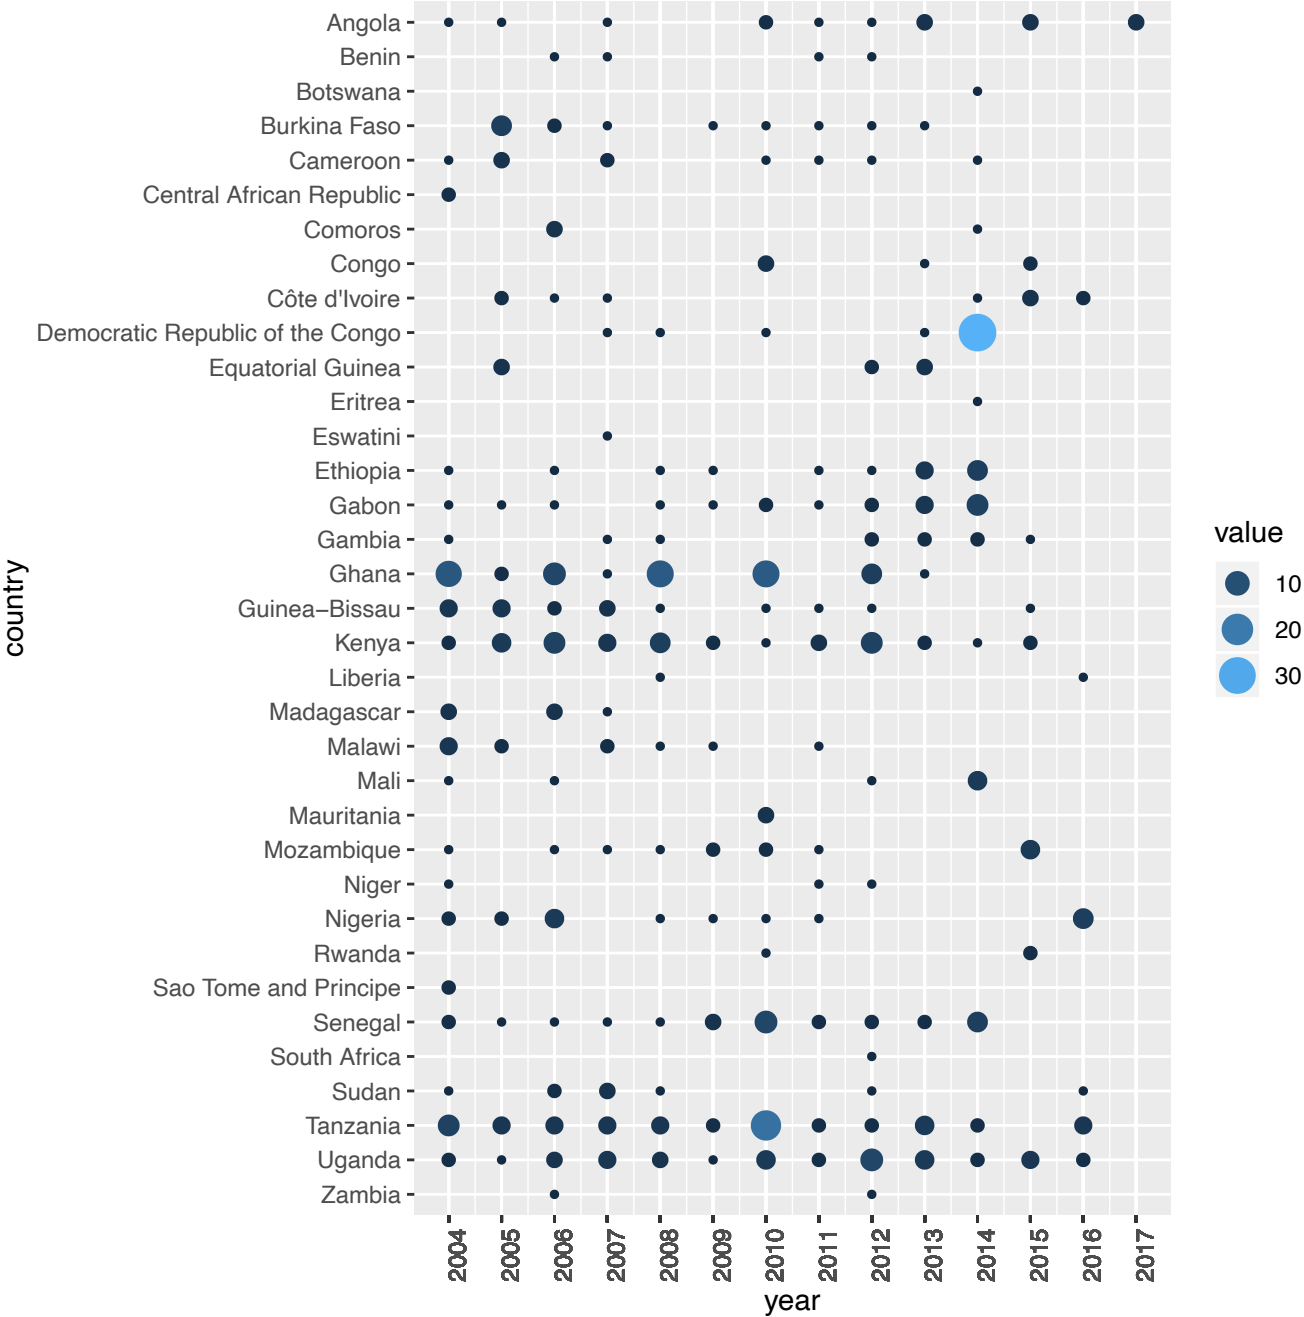

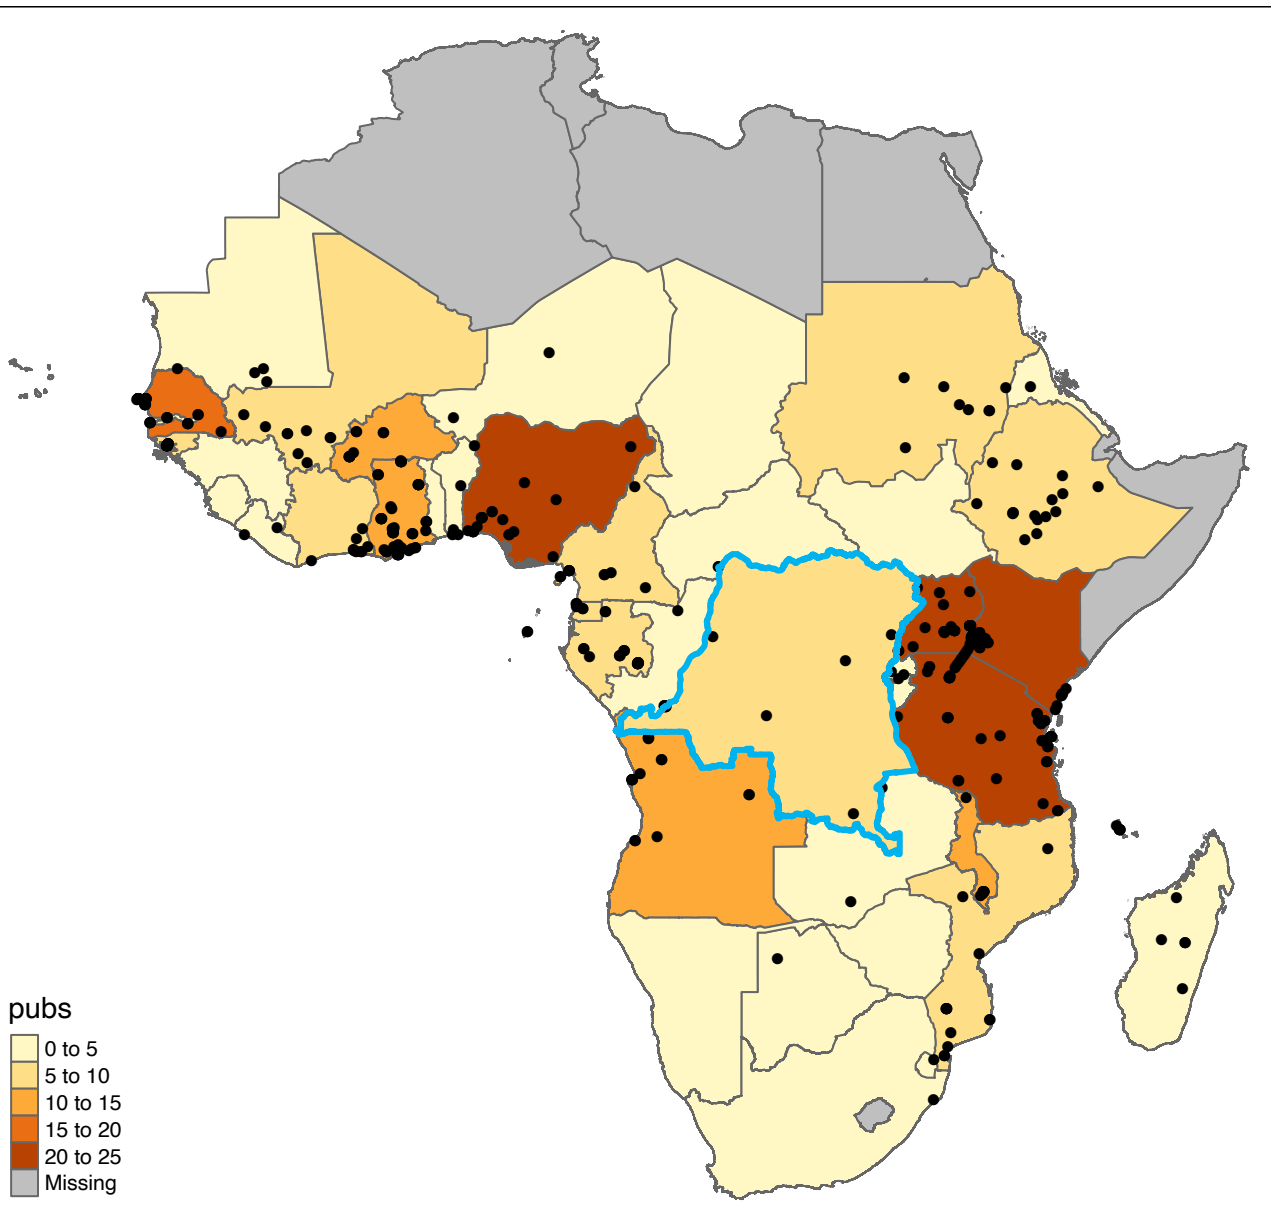

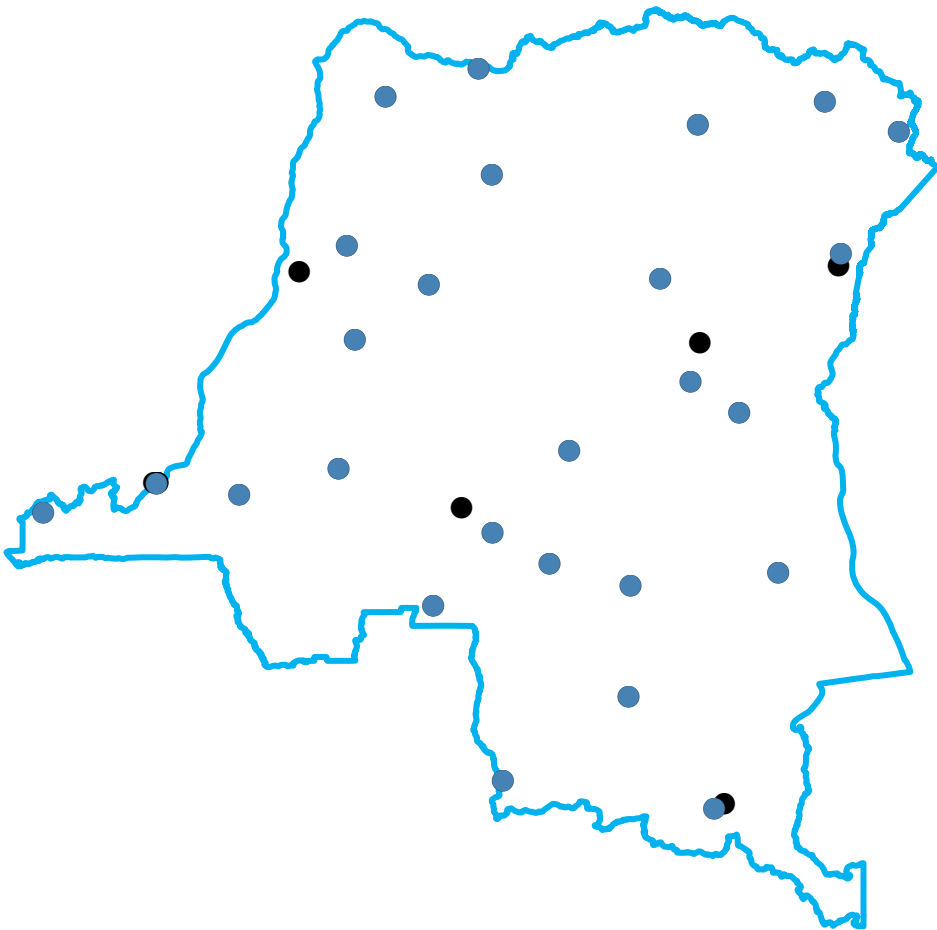

pfprt 76T

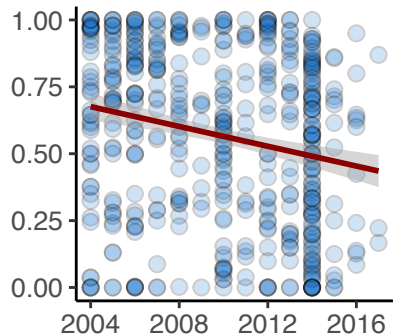

pfmdr1 86Y

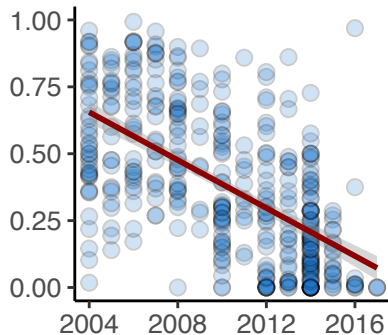

pfmdr1 184F

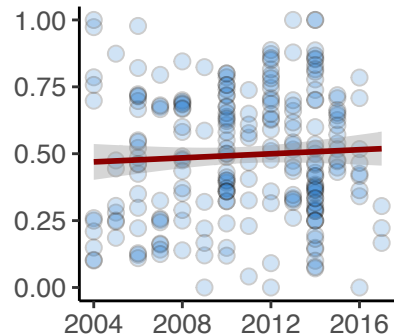

pfmdr1 1246Y

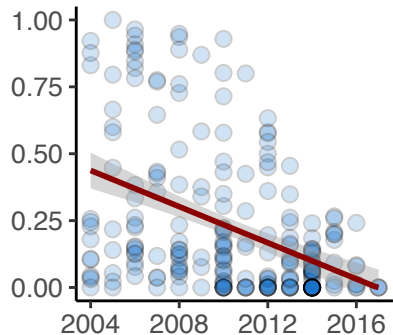

pfmdr1 copy number >1

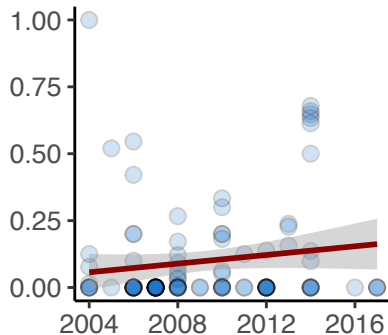

Ghana pfprt K76T 2004–2009

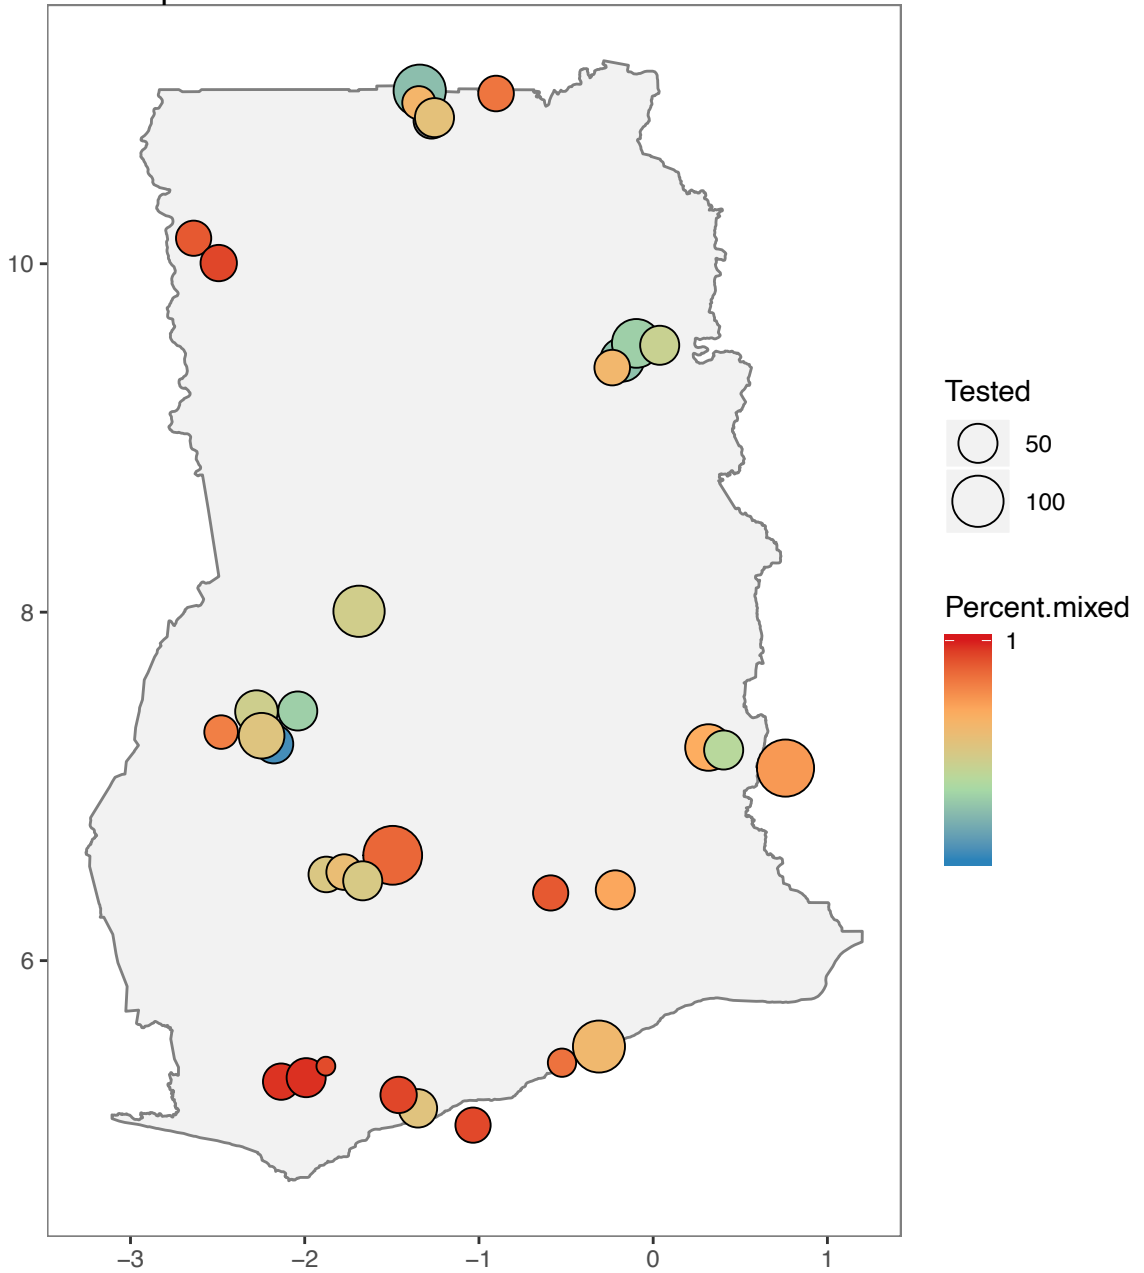

# Ghana pfprt K76T 2010–2018

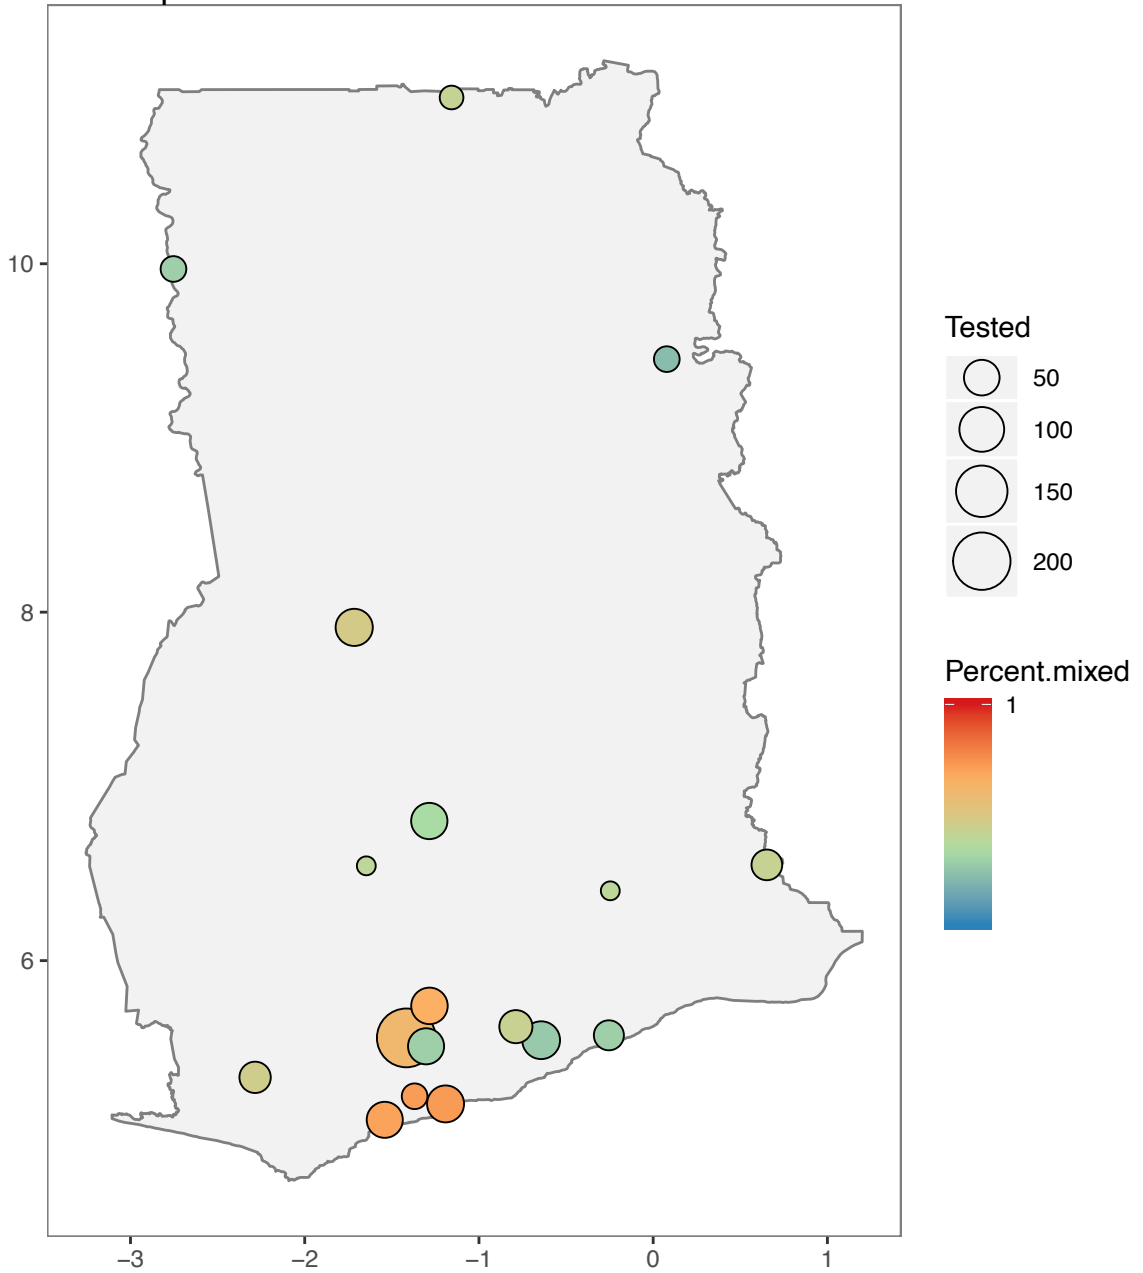



# Nigeria pfprt K76T 2004–2009

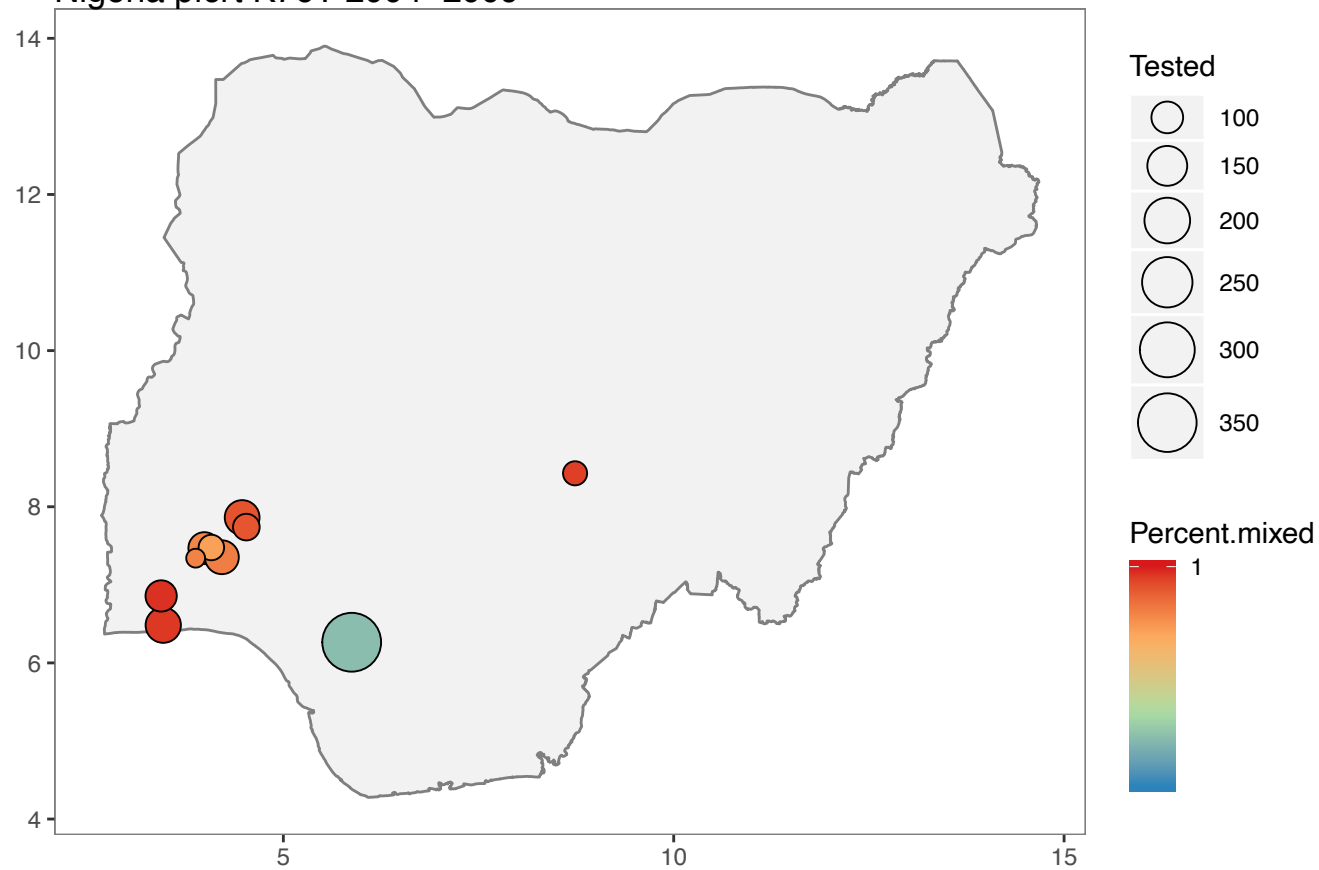

# Nigeria pfprt K76T 2010–2018

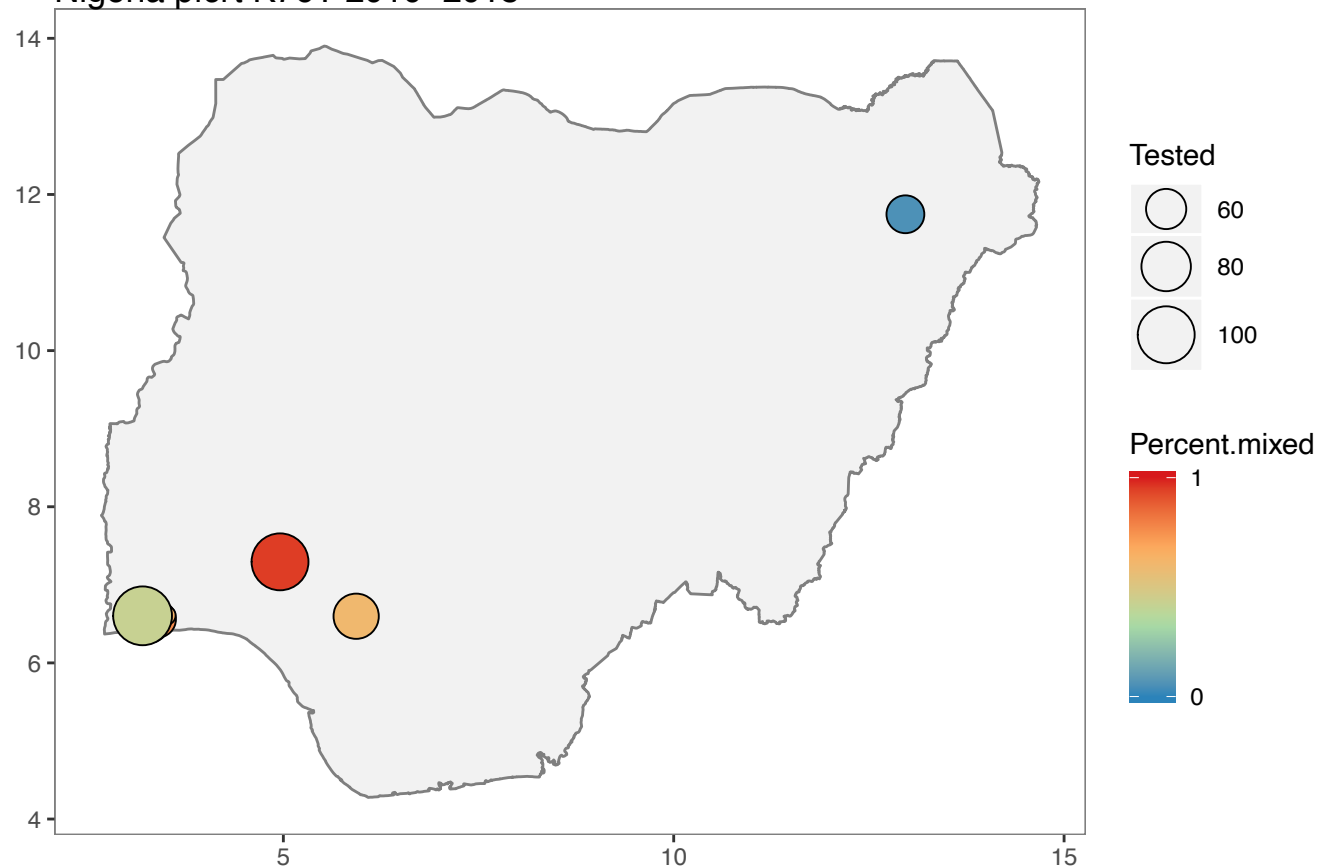

# Uganda pfprt K76T 2004–2009

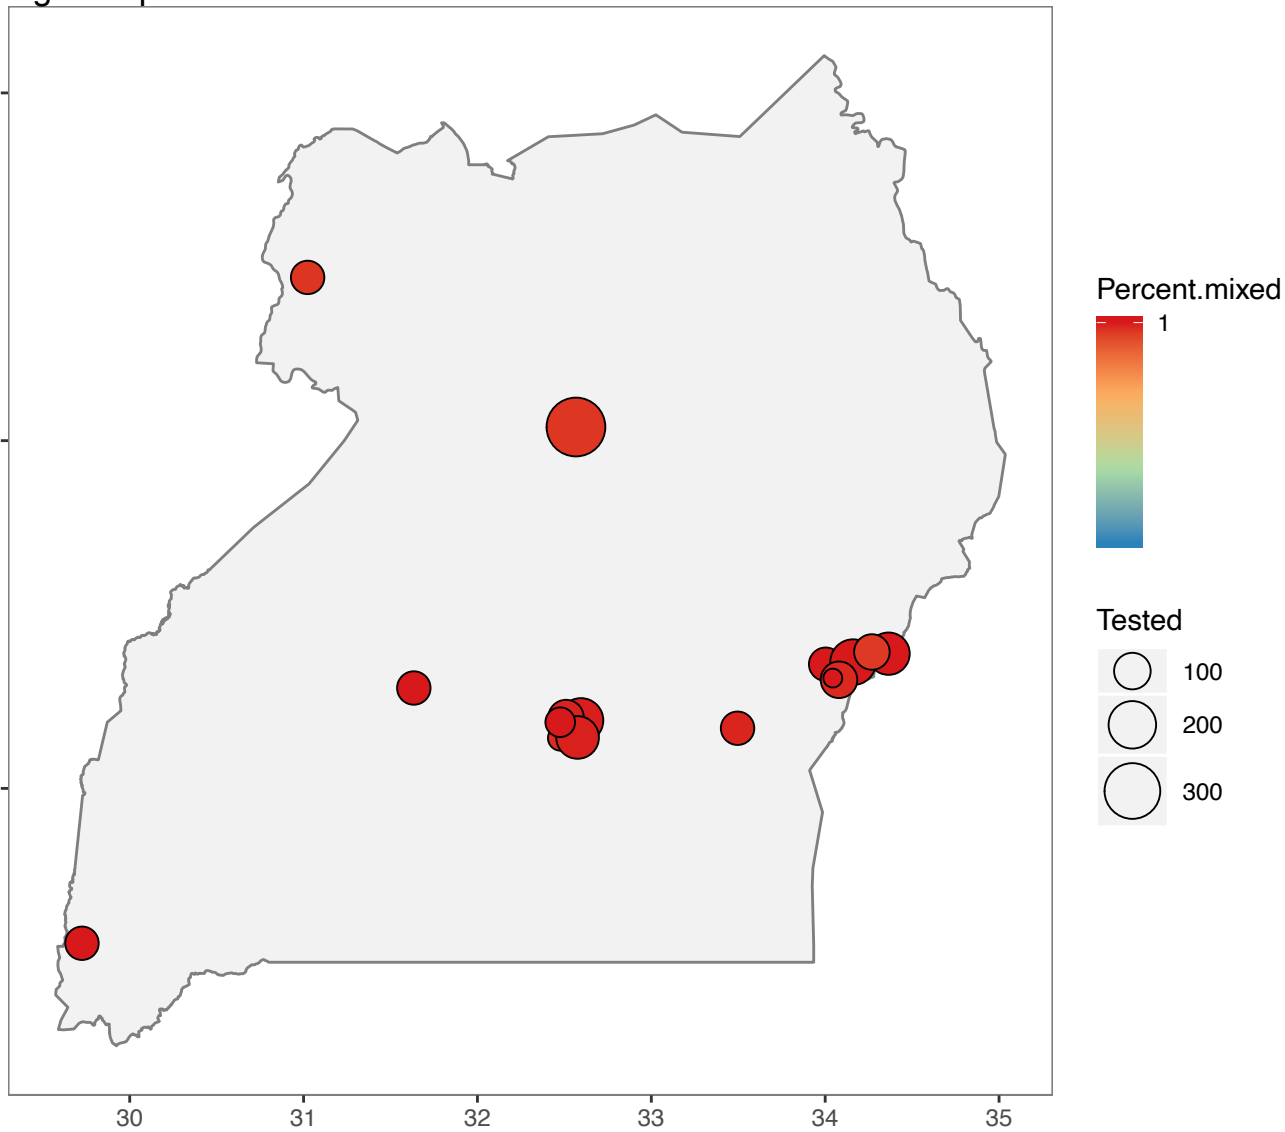

# Uganda pfprt K76T 2010–2018

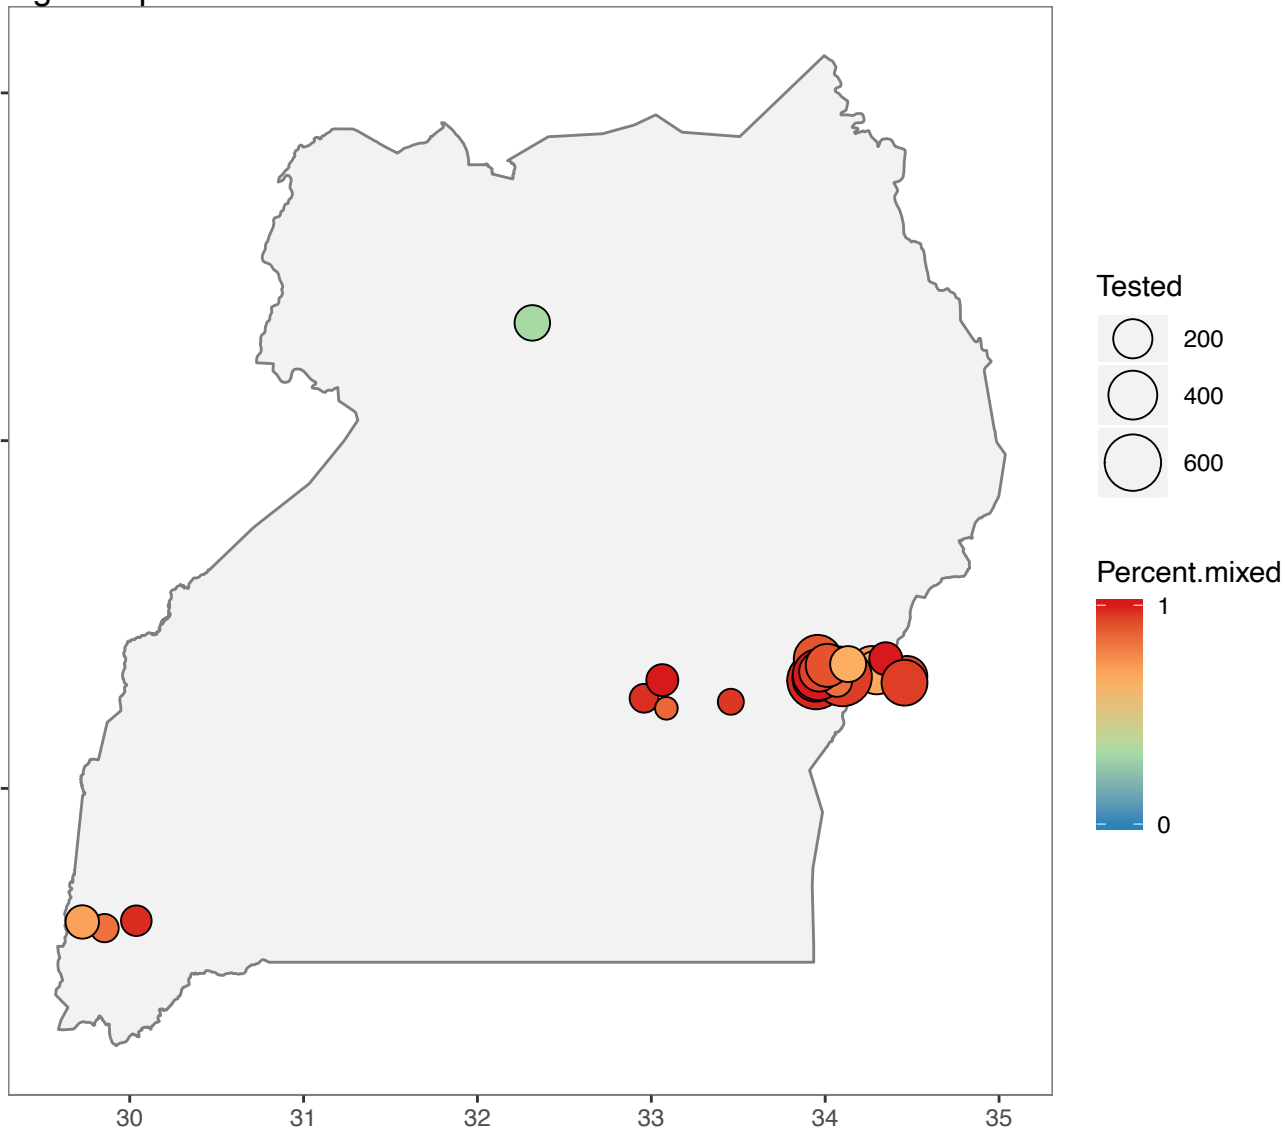

Supplement: NIHMS1633372-supplement-2.pdf [file NIHMS1633372-supplement-2.pdf]
